# Supplementary material
Source: publisher figshare collection journal article supplement (https://acs.figshare.com/ndownloader/files/17182688)
Supplement: Supplementary file 1 [file 17182688]

# Supporting Information

## Hierarchical Hybridization in Plasmonic Honeycomb Lattices

Ran Li,<sup>†</sup> Marc R. Bourgeois,<sup>‡</sup> Charles Cherqui,<sup>‡</sup> Jun Guan,<sup>¶</sup> Danqing Wang,<sup>¶</sup>  
Jingtian Hu,<sup>†</sup> Richard D. Schaller,<sup>‡</sup> George C. Schatz,<sup>\*,‡</sup> and Teri W. Odom<sup>\*,†</sup>

<sup>†</sup>*Department of Materials Science and Engineering*

<sup>‡</sup>*Department of Chemistry*

<sup>¶</sup>*Graduate Program in Applied Physics, Northwestern University, Evanston, Illinois 60208,  
United States*

E-mail: g-schatz@northwestern.edu; todom@northwestern.edu

### List of Figures

|   |                                                                                  |    |
|---|----------------------------------------------------------------------------------|----|
| 1 | Hexagonal lattice $\Gamma_1$ SLR . . . . .                                       | S2 |
| 2 | Ag NP dimer spectra . . . . .                                                    | S3 |
| 3 | $\Gamma_1$ lasing characterization from a Ag NP lattice . . . . .                | S3 |
| 4 | Calculated $\Gamma_1$ lasing spectrum . . . . .                                  | S4 |
| 5 | $\Gamma_1$ input-output curves for Al NP lattice . . . . .                       | S4 |
| 6 | Surface charge distributions of out-of-plane quadrupole $\Gamma_2$ SLR . . . . . | S5 |
| 7 | $\Gamma_2$ Bragg mode and single Al NP response . . . . .                        | S5 |
| 8 | $\Gamma_2$ lasing characterization . . . . .                                     | S6 |

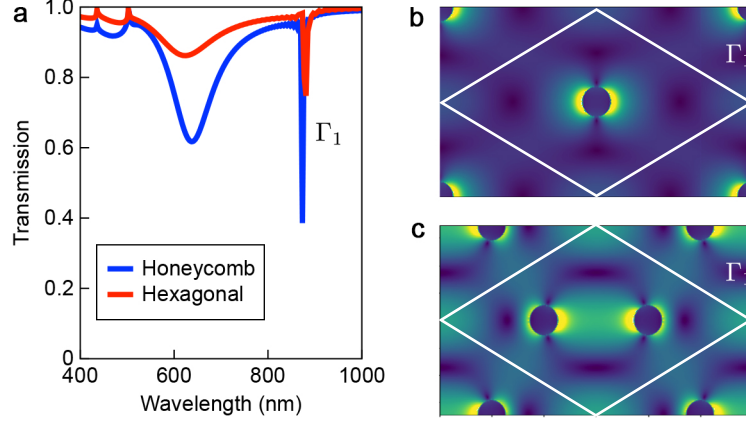

Figure S1:  $\Gamma_1$  SLR in hexagonal lattice. (a)  $\Gamma$  point x-polarized transmission spectra for honeycomb and hexagonal lattices calculated using FDTD. (b) Calculated electric field magnitude, normalized to that of the incident field, of  $\Gamma_1$  SLR within the XY plane of hexagonal lattice unit cell. (c) Figure 1e of the main text reproduced for comparison with panel b).

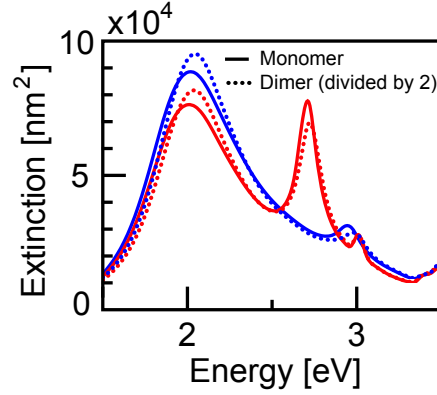

Figure S2: The spectral profiles of the Ag NP ( $d = 110$  nm;  $h = 50$  nm) dimer (dashed) closely match those of the isolated Ag NP (solid) after normalizing the former by a factor of 2 to account for the particle number. Deviations from the single-particle responses are small due to the 400 nm center-to-center distance between NPs in the dimer structure. The trace colors correspond to the plane wave excitation conditions in Figure 2 of the main text. Explicitly, red and blue traces correspond to incident plane waves polarized along short- and long-axes of the disc, respectively.

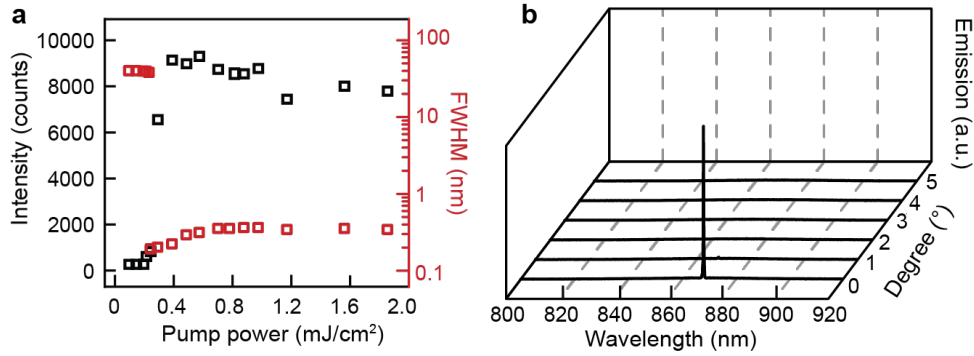

Figure S3:  $\Gamma_1$  lasing characterization from Ag NP lattice. (a) Light-light curve of  $\Gamma_1$  lasing and power-dependent emission FWHM. Lasing intensities and linewidths are plotted on linear and logarithmic scales, respectively. (b) Angle-resolved emission of  $\Gamma_1$  lasing.

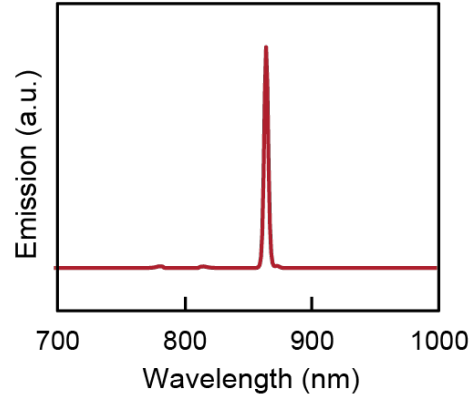

Figure S4: Simulated  $\Gamma_1$  lasing emission peak matches wavelength of  $\Gamma_1$  resonance in the absence of dye. Calculation details included in the main text.

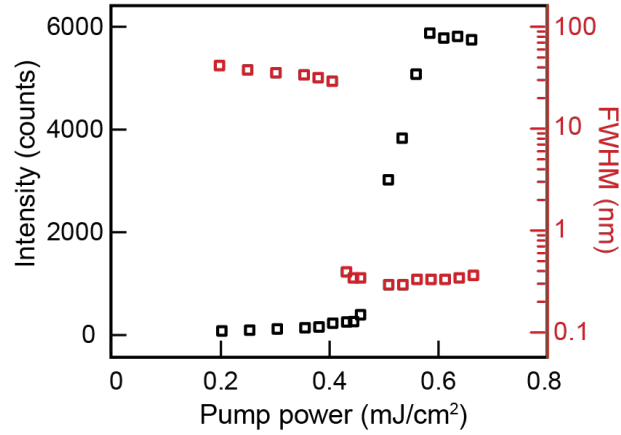

Figure S5: Lasing input-output curves suggesting the non-linear increase of intensity and threshold value of Al nanoparticle arrays. Lasing intensities are plotted on a linear scale. The power dependence of the emission FWHM is included in red on a logarithmic scale.

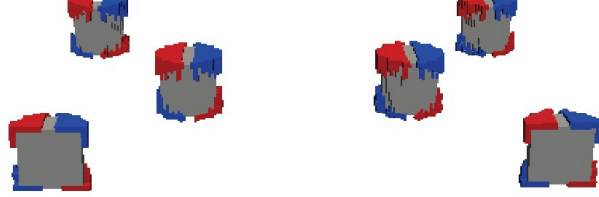

Figure S6: Surface charge distributions at  $\Gamma_2$  resonance showing the charge accumulates at top and bottom surfaces of Al nanoparticles. Note that the two nearest and furthest NPs appear cut in half vertically since a rectangular region was simulated in FDTD using Bloch boundary conditions to produce these plots.

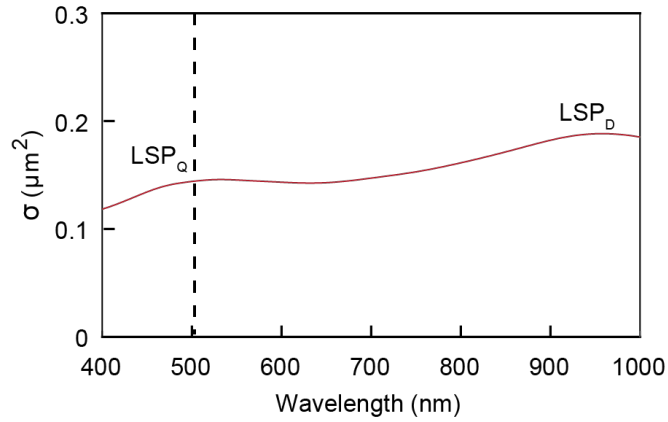

Figure S7: The Bragg mode associated with the  $\Gamma_2$  resonance (denoted by the dash line) with the calculated scattering cross section of an isolated Al NP ( $d = 110$  nm;  $h = 100$  nm) in a medium with refractive index equal to 1.45. The spectral overlap between the out-of-plane quadrupole localized surface plasmon and the lattice Bragg mode facilitates the formation of the sharp  $\Gamma_2$  lattice mode.

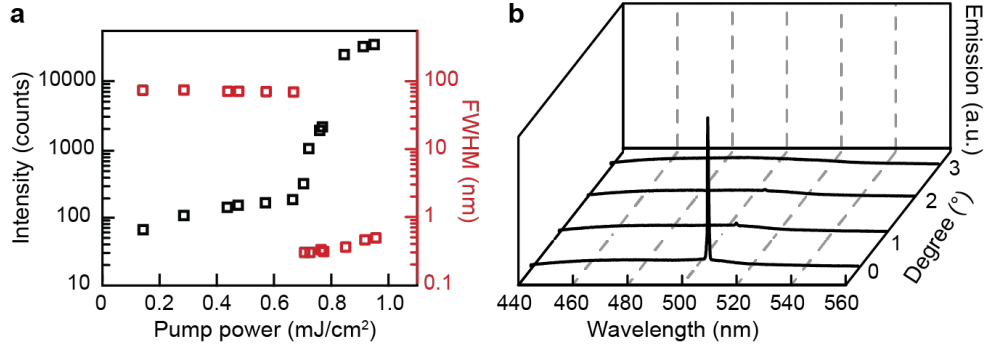

Figure S8: Light-light curve and angle-resolved emission suggested that  $\Gamma_2$  lasing occurred at the  $\Gamma$  point ( $k_{\parallel} = 0$ ). (a) Input-output curves and power-dependent emission FWHM of  $\Gamma_2$  lasing. Lasing intensities and linewidths are plotted on a logarithmic scale. (b) Angle-resolved emission spectra measured from  $0^\circ$  to  $3^\circ$ .
